# Supplementary figures and images for: The alternative sigma factor σX mediates competence shut-off at the cell pole in Streptococcus pneumoniae
Source: eLife journal article supplement (doi:10.7554/elife.62907), 2020-11-02

A

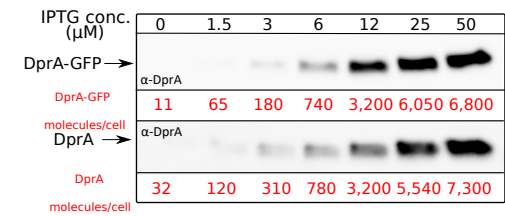

B

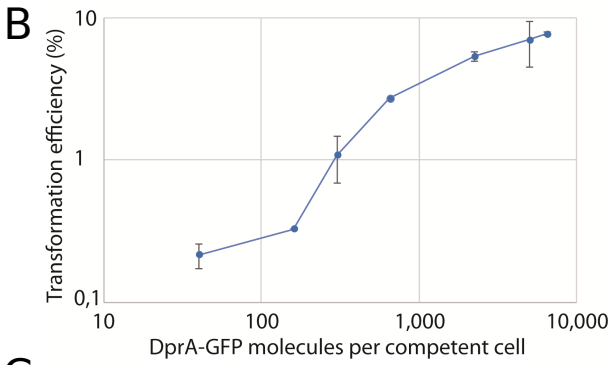

C

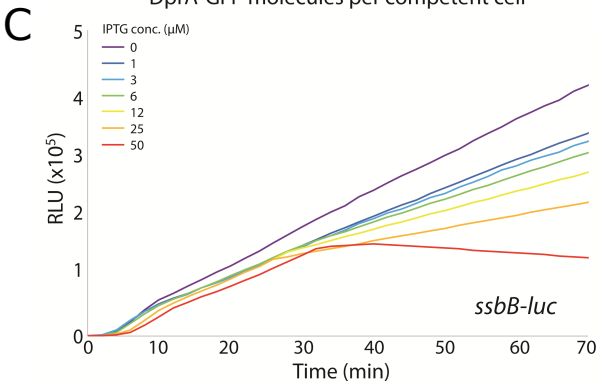

Supplement: supp [file elife-62907-supp-v1.zip]

# A

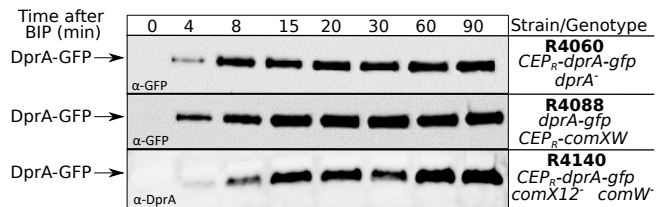

# B

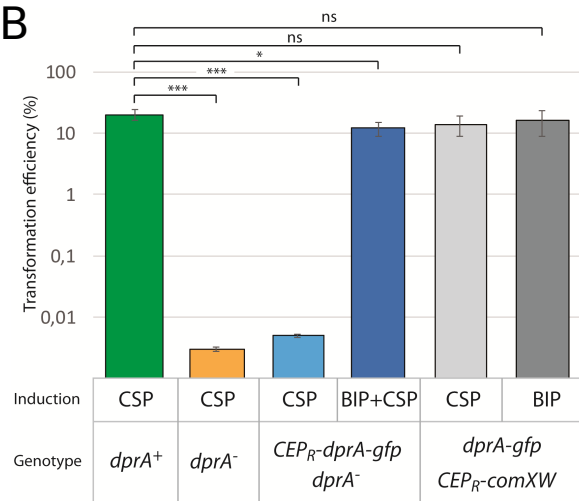

# C

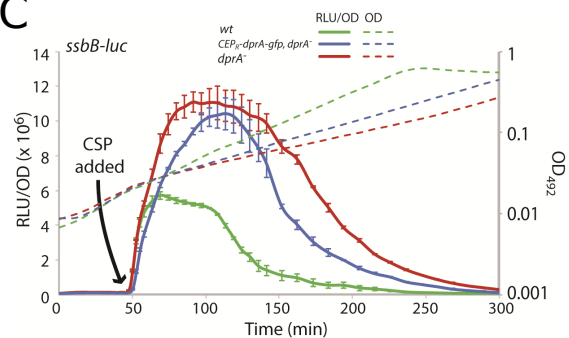

# D

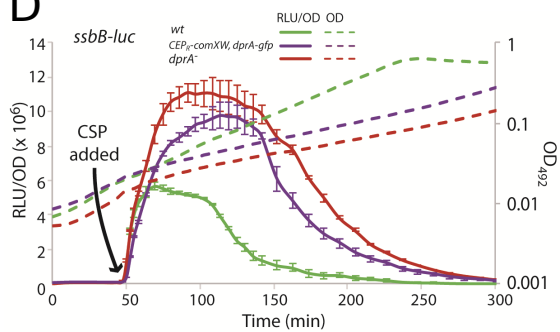

Supplement: supp [file elife-62907-supp-v1.zip]

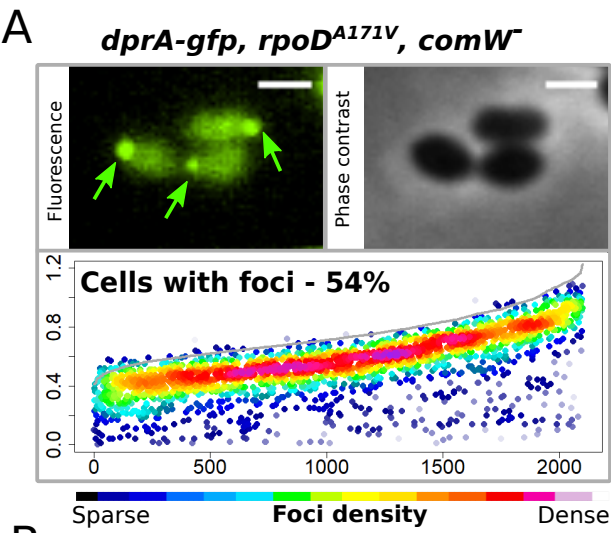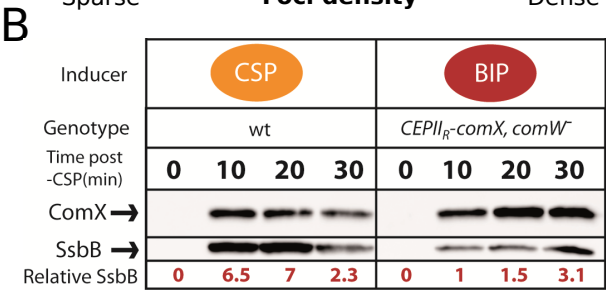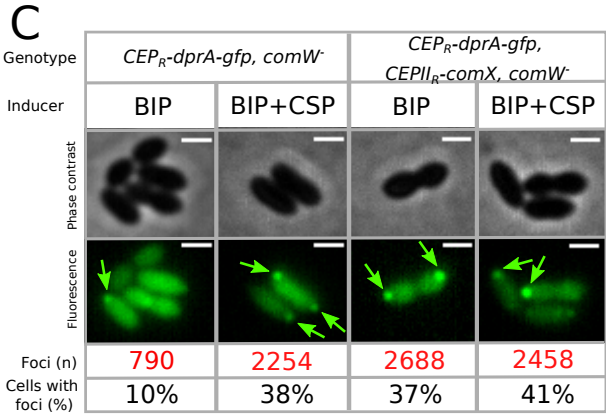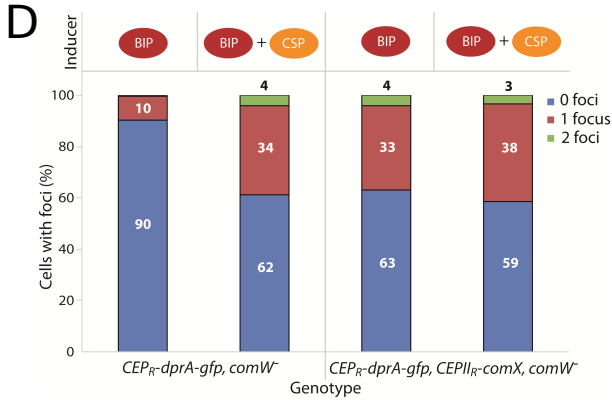

Supplement: supp [file elife-62907-supp-v1.zip]

# A ComE-GFP

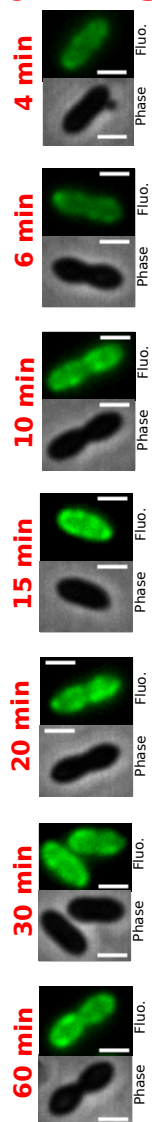

# B GFP-ComD

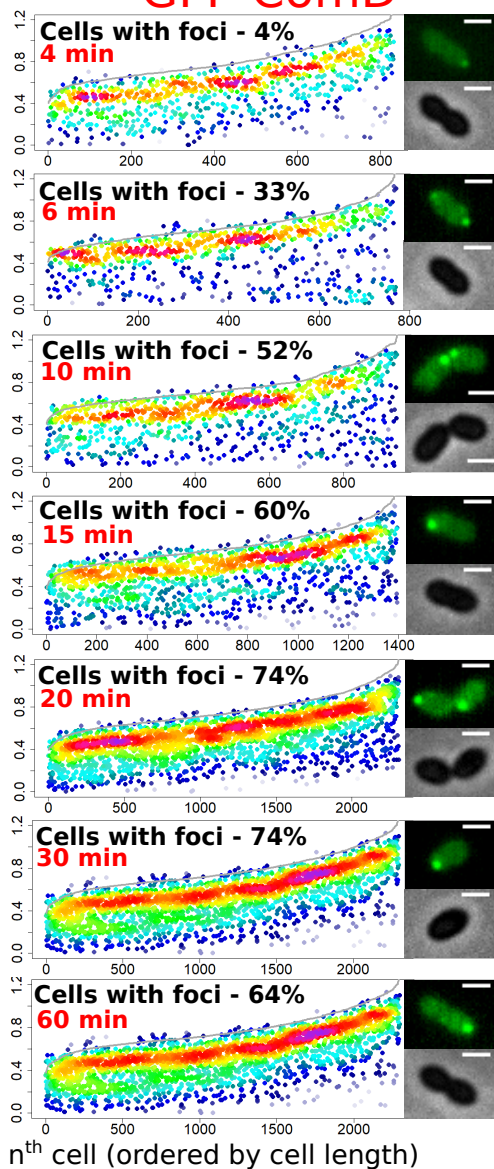

# C CSP-HF

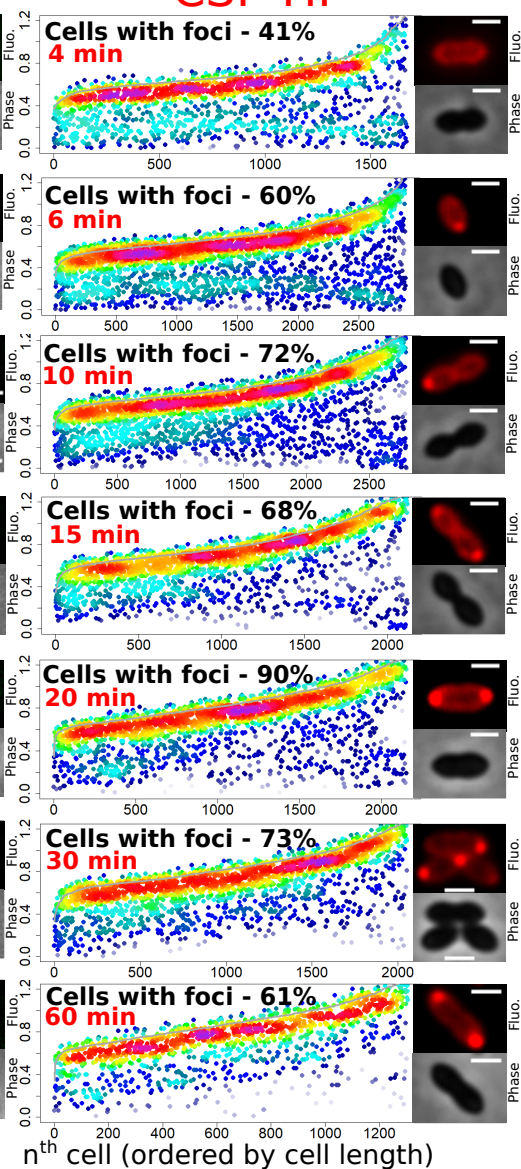

Supplement: supp [file elife-62907-supp-v1.zip]

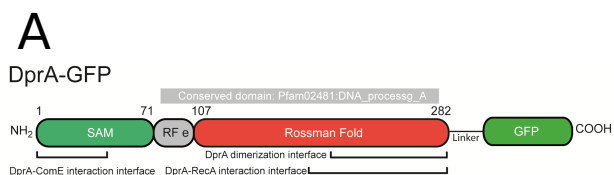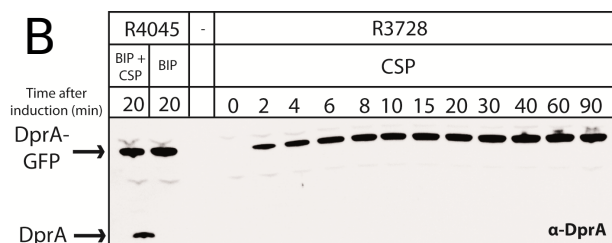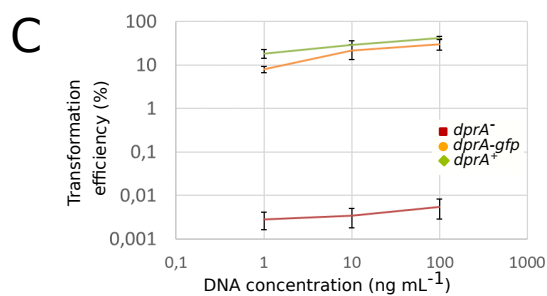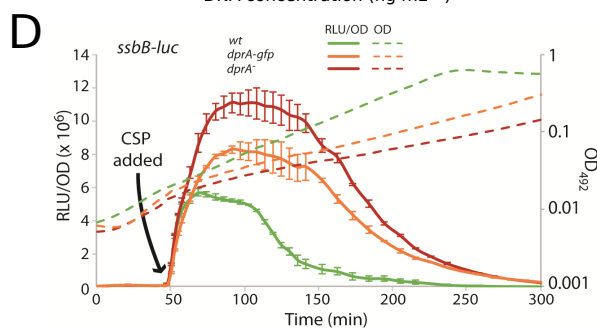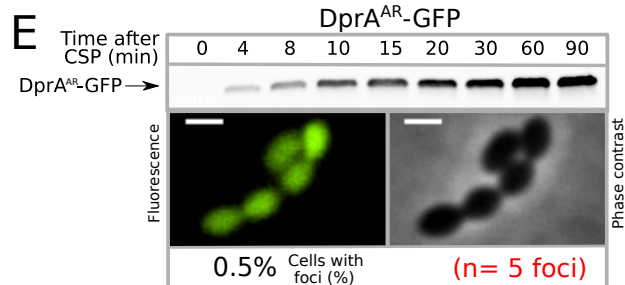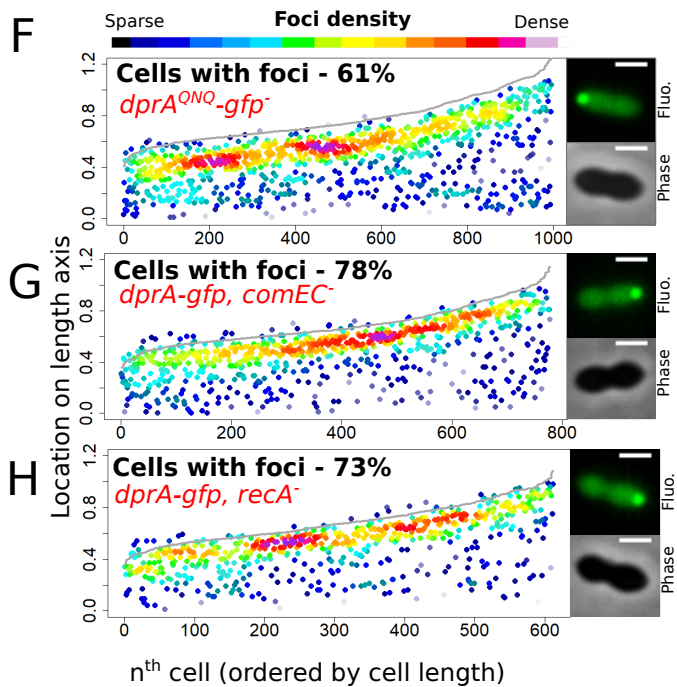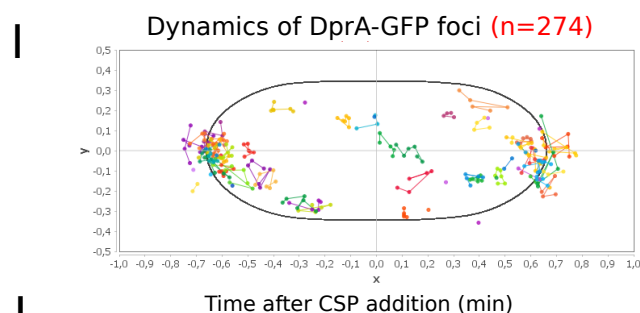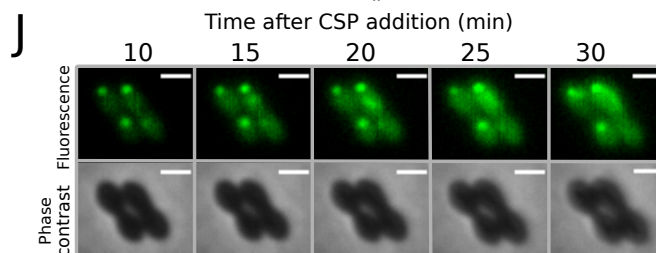

Supplement: supp [file elife-62907-supp-v1.zip]

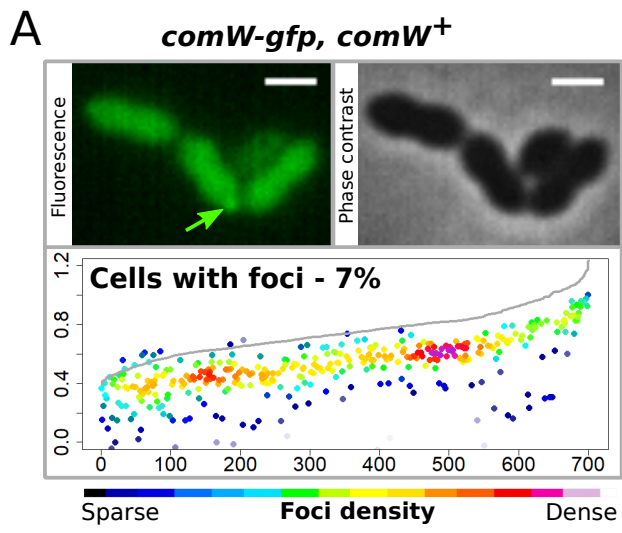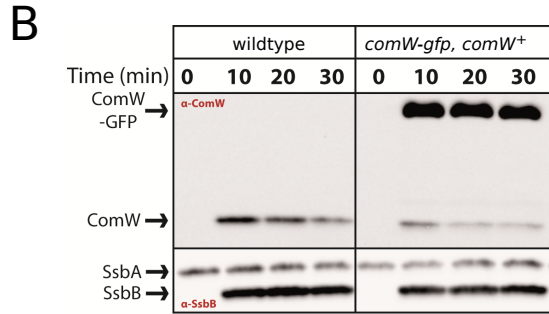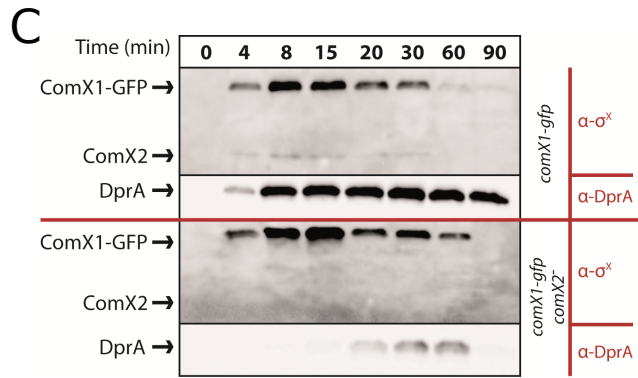

**G**  $\sigma^x$  immunofluorescence microscopy (15 min post-CSP)

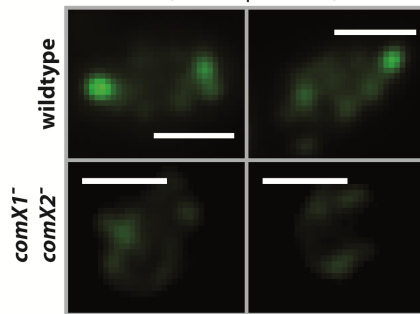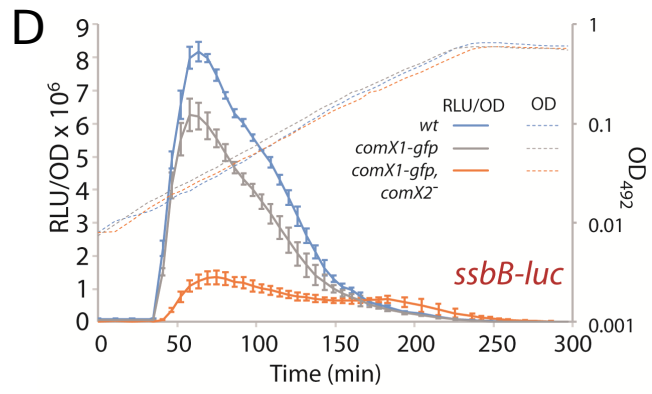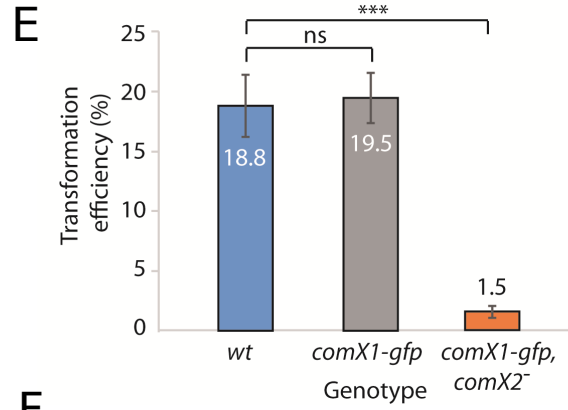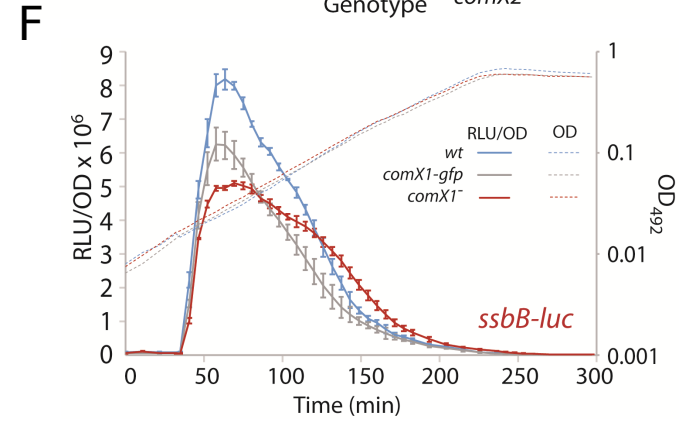

Supplement: supp [file elife-62907-supp-v1.zip]

**A**

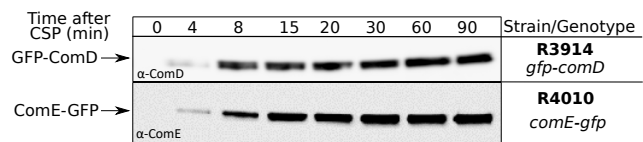

**B**

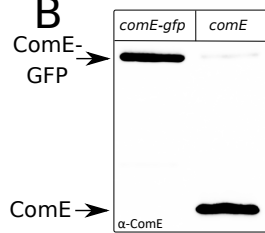

**C**

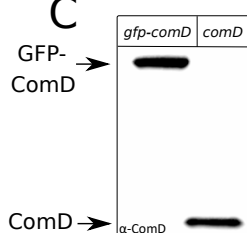

**D**

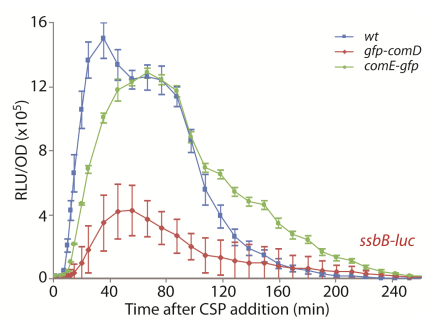

**E**

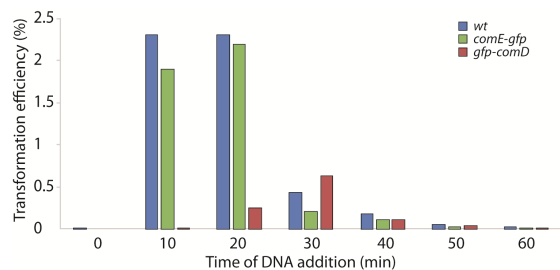

**F**

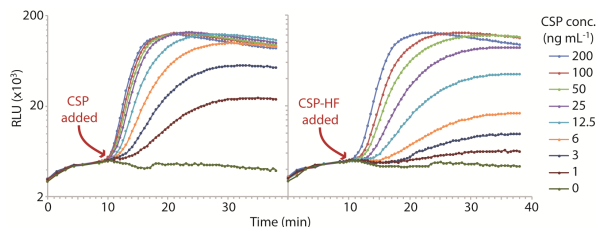

**G**

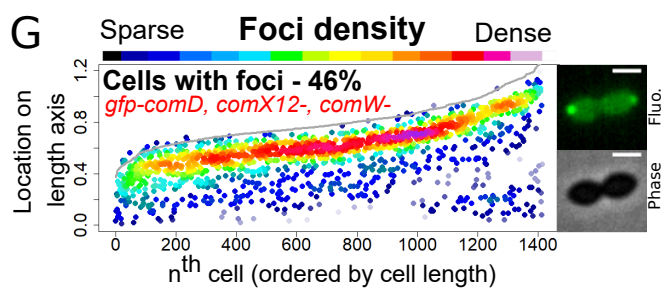

Supplement: supp [file elife-62907-supp-v1.zip]
